# Supplementary material for: Haptic perception disambiguates visual perception of 3D shape
Source: Springer Nature journal article supplement (doi:10.1007/s00221-009-1713-9), 2009-02-07
Supplement: MOESM1 [file 25615378]

frontal

oblique

vision-only

vision+haptics

vision-only

vision+haptics

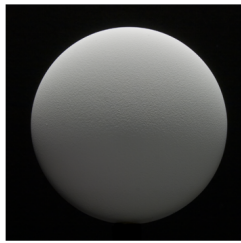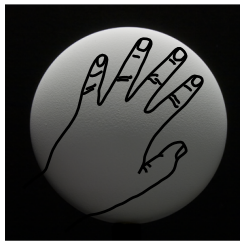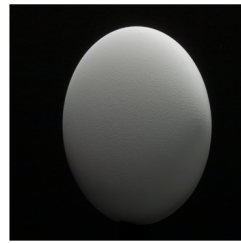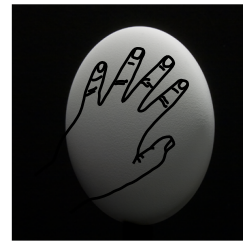

Observer

MB

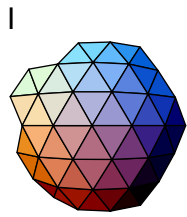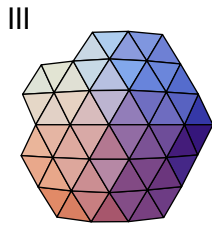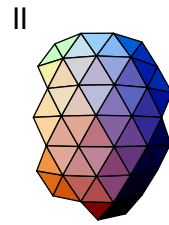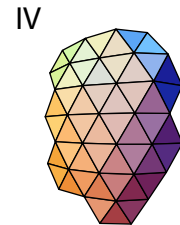

front view

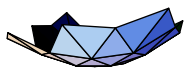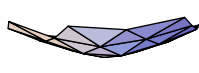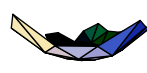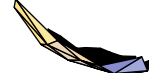

top view

AD

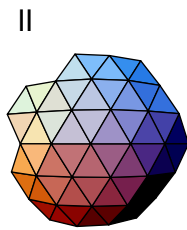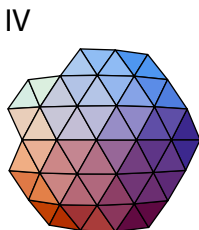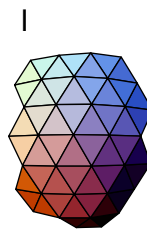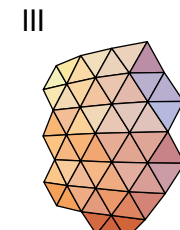

front view

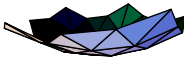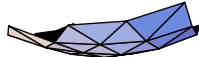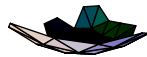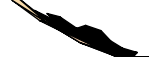

top view

BH

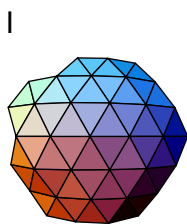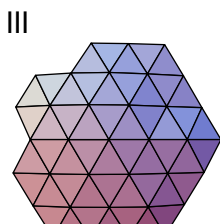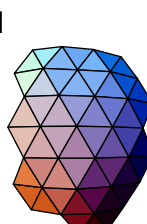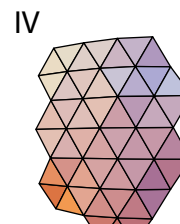

front view

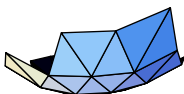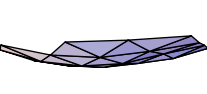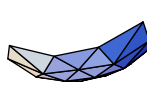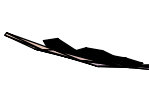

top view

AB

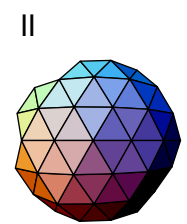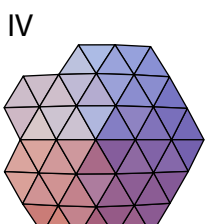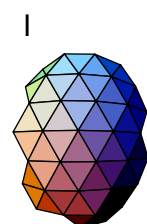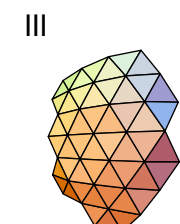

front view

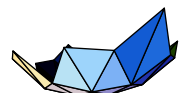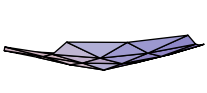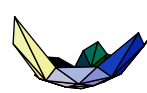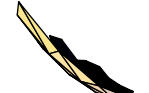

top view

**Supplementary figure.** Front and top view of depth maps for all observers and all conditions. On top, the visual stimuli are presented. Haptic stimuli were similar in shape but were not spray-painted. The order of the sessions is indicated by I-IV.
